# Supplementary material
Source: PubMed Central journal article supplement (PMC3354723)

# SUPPL. FIGURE 1

**GBM SF268  
(EGFR-A289V)**

Forward

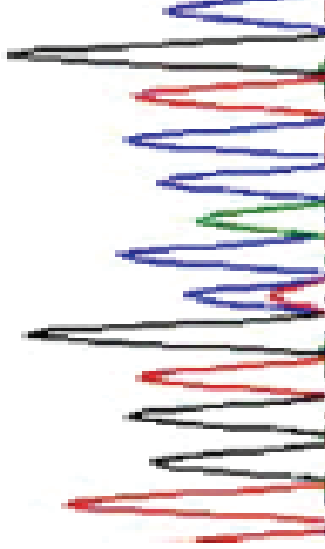

C/T

**GBM SKMG3  
(EGFR-A289D)**

Forward

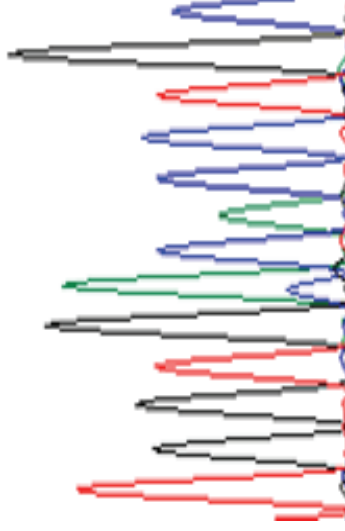

C/A

Reverse

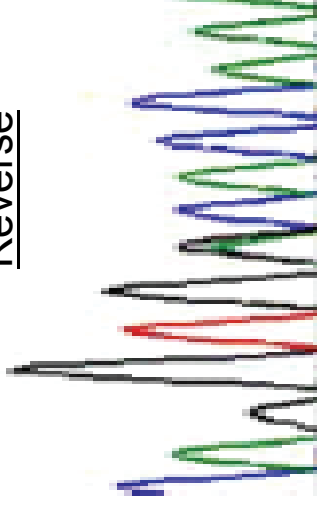

G/A

Reverse

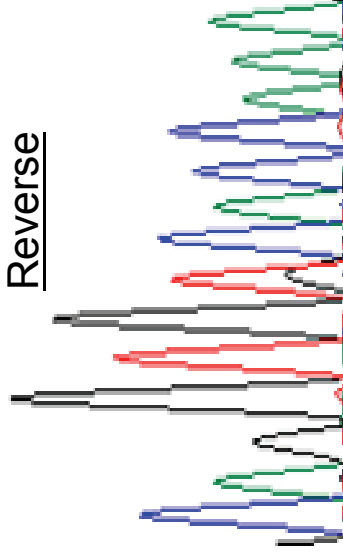

G/T

# SUPPL. FIGURE 2

## SKMG3 (EGFR A289D)

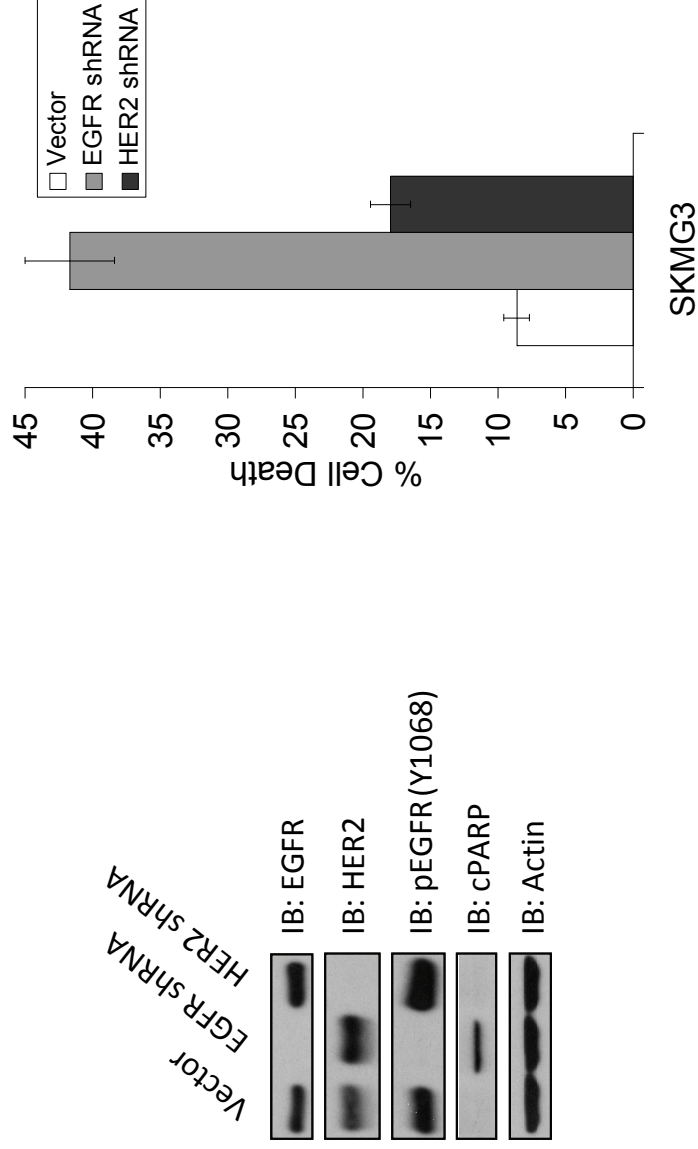

# SUPPL. FIGURE 3

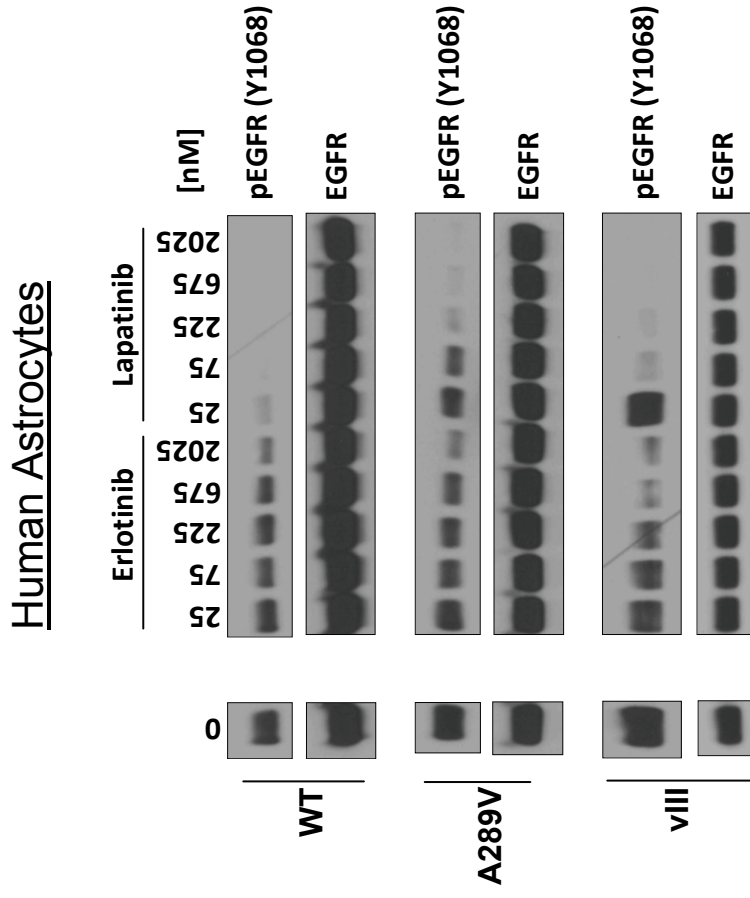

# SUPPL. FIGURE 4

## A

L858R EGFR  
(H3255 Lung Ca)

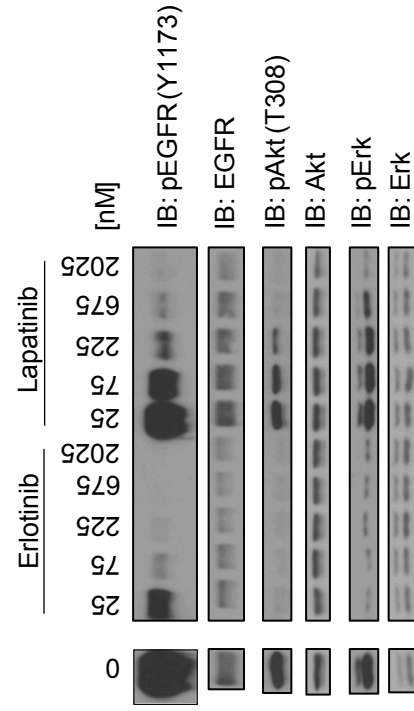

## B

EGFR $\Delta$ 747-749  
(HCC4006 Lung Ca)

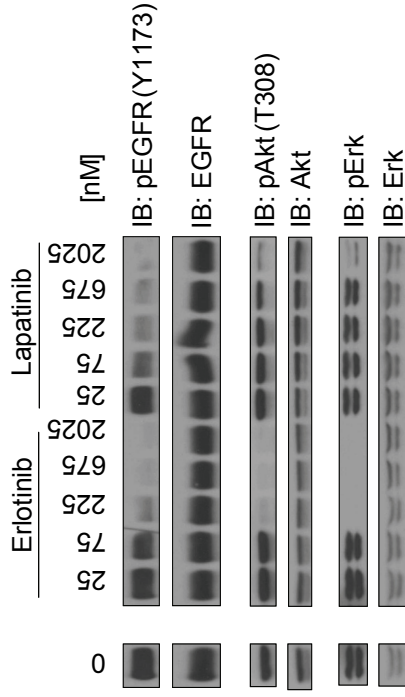

## C

A289D EGFR  
(SKMG3 GBM)

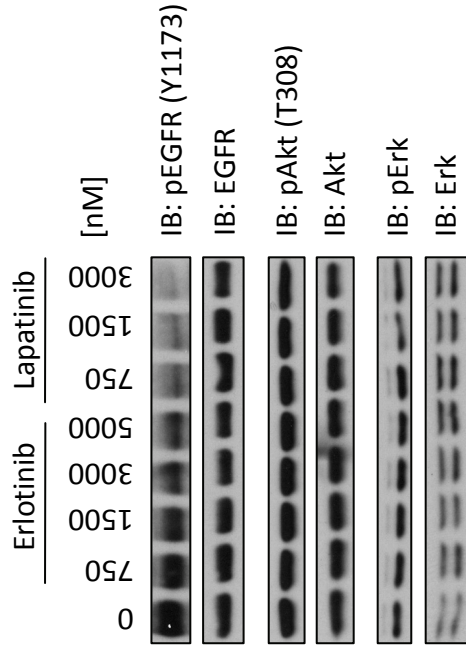

# SUPPL. FIGURE 5

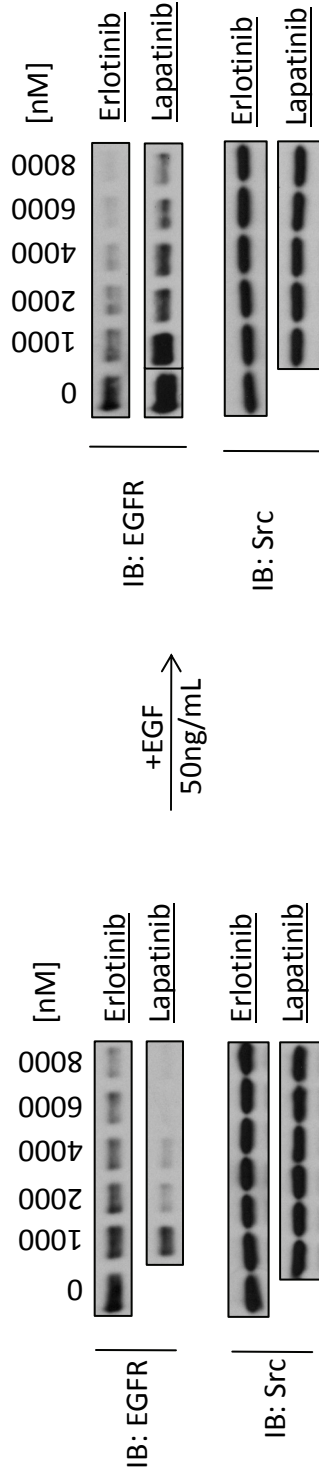

NR6-EGFR-A289D

# SUPPL. FIGURE 6

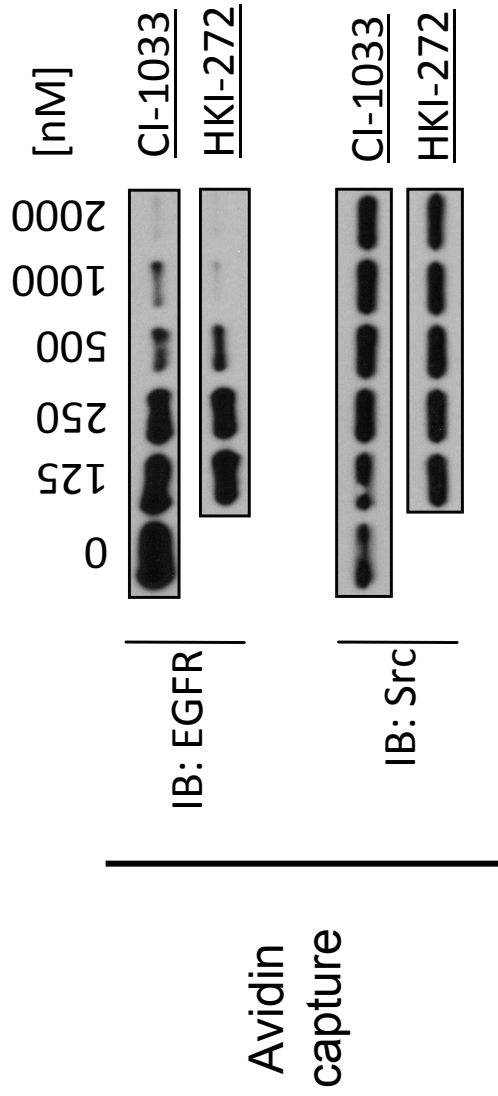

# SUPPL. FIGURE 7

**A**

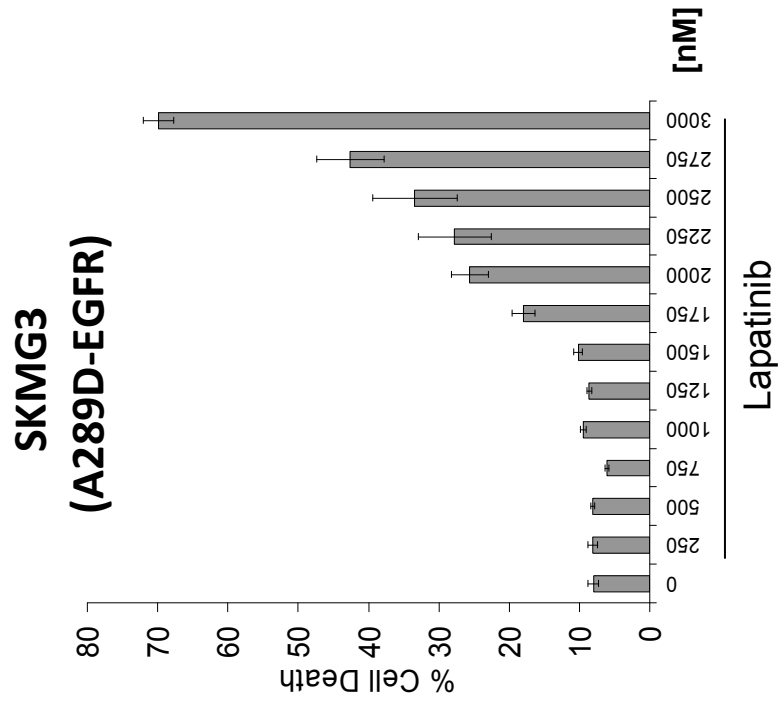

**B**

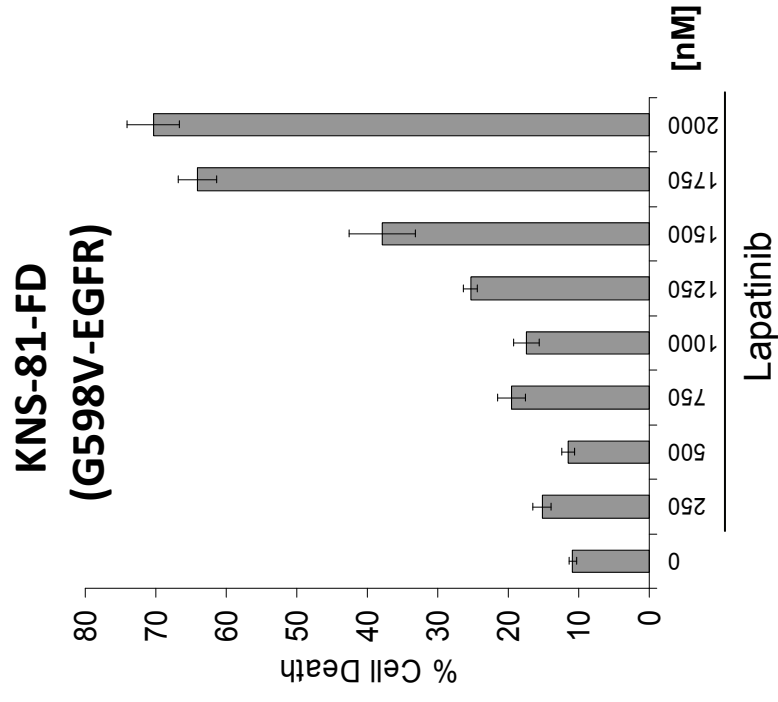

# SUPPL. FIGURE 8

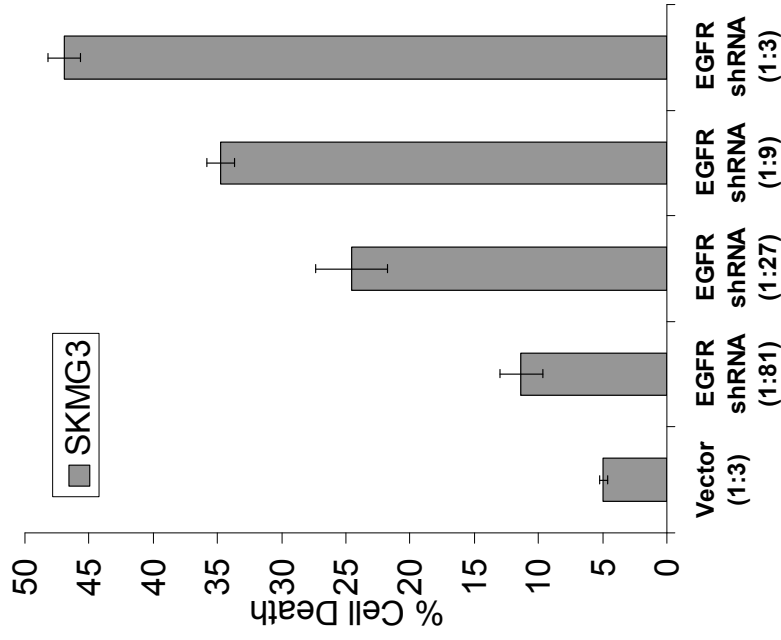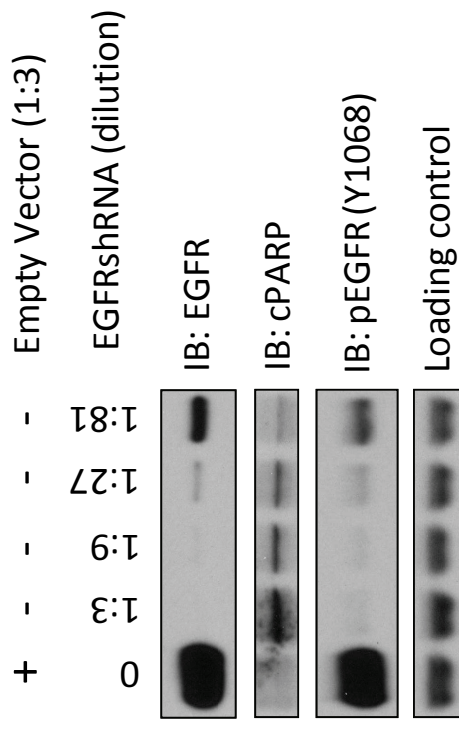



# SUPPL. FIGURE 9

**A**

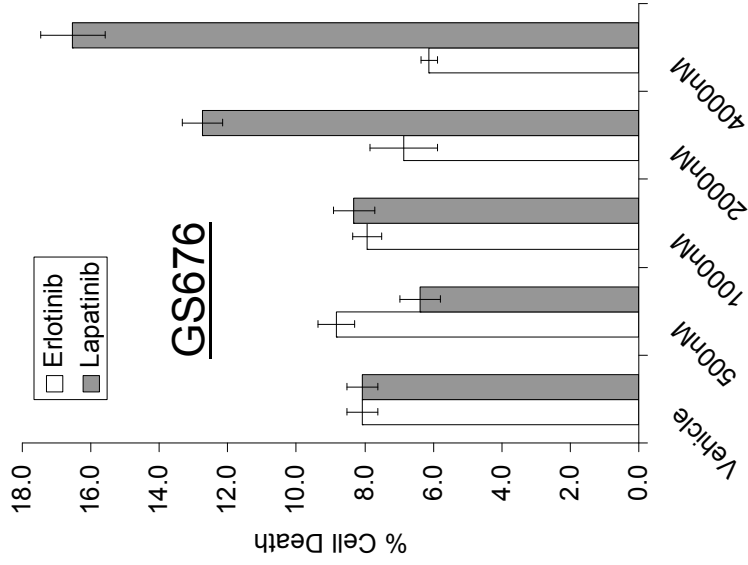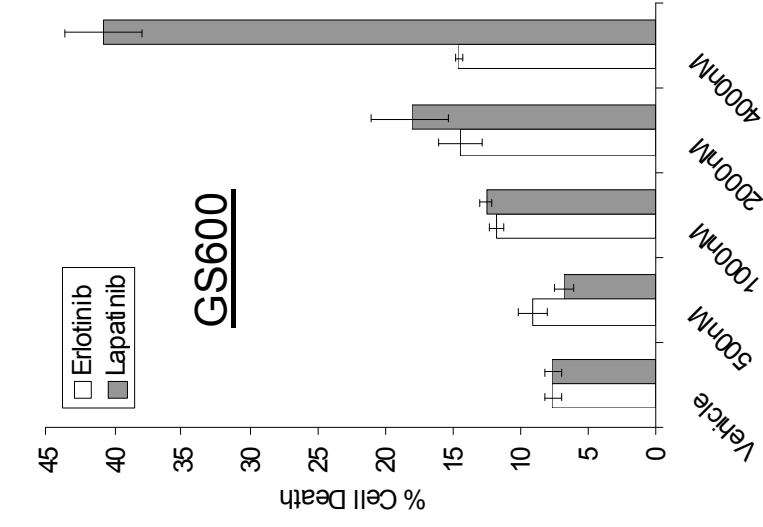

**C**

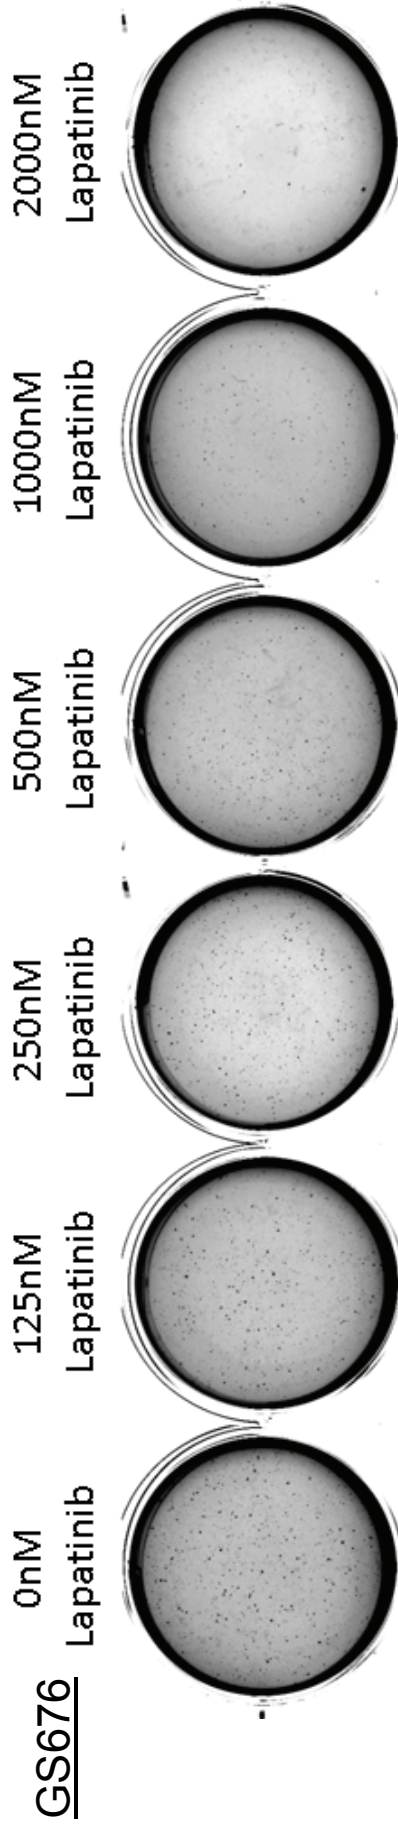

# SUPPL. FIGURE 10

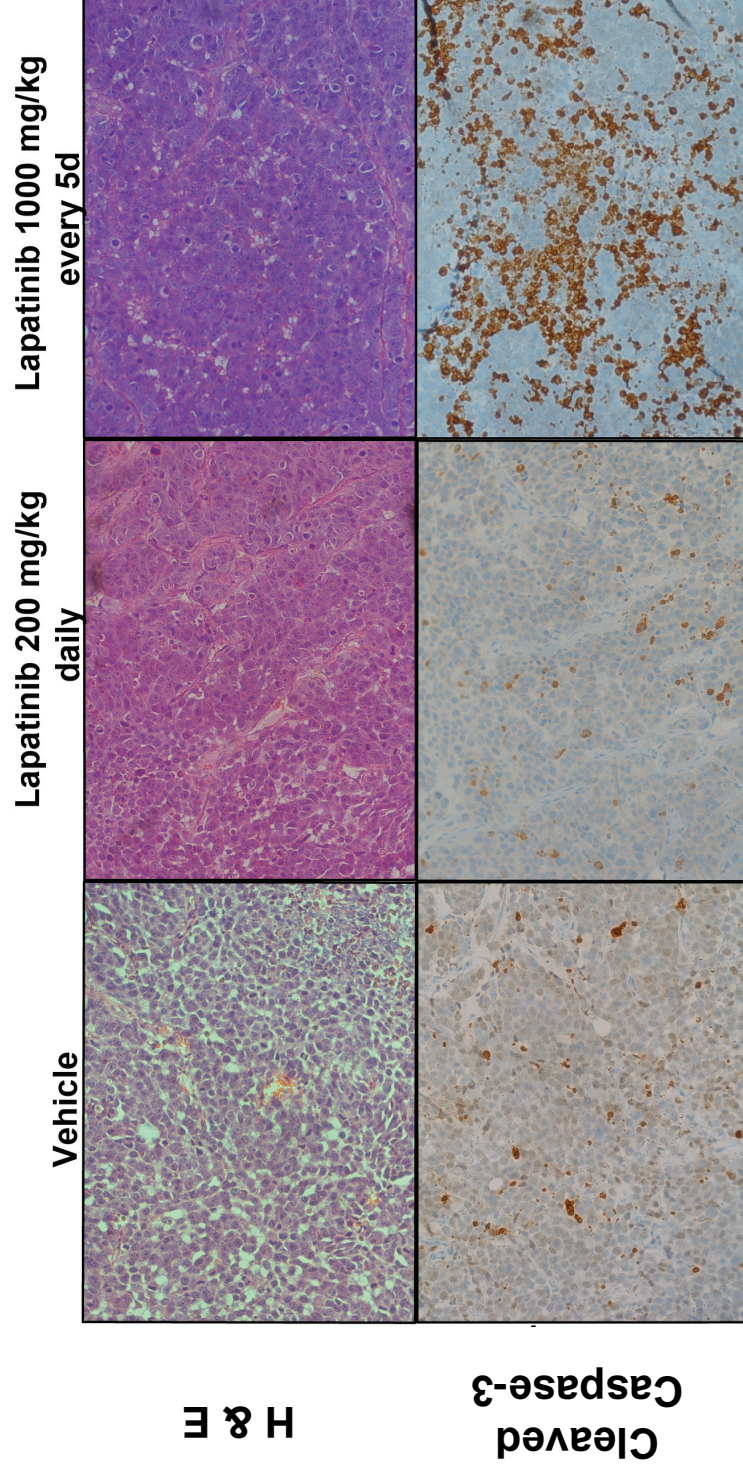

Supplement: NIHMS361229-supplement-Suppl__Figures.pdf [file NIHMS361229-supplement-Suppl__Figures.pdf]
